# Supplementary material
Source: PubMed Central journal article supplement (PMC2527206)
Supplement: supp_M801371200_QR2ZhangSUPP.pdf [file supp_M801371200_QR2ZhangSUPP.pdf]

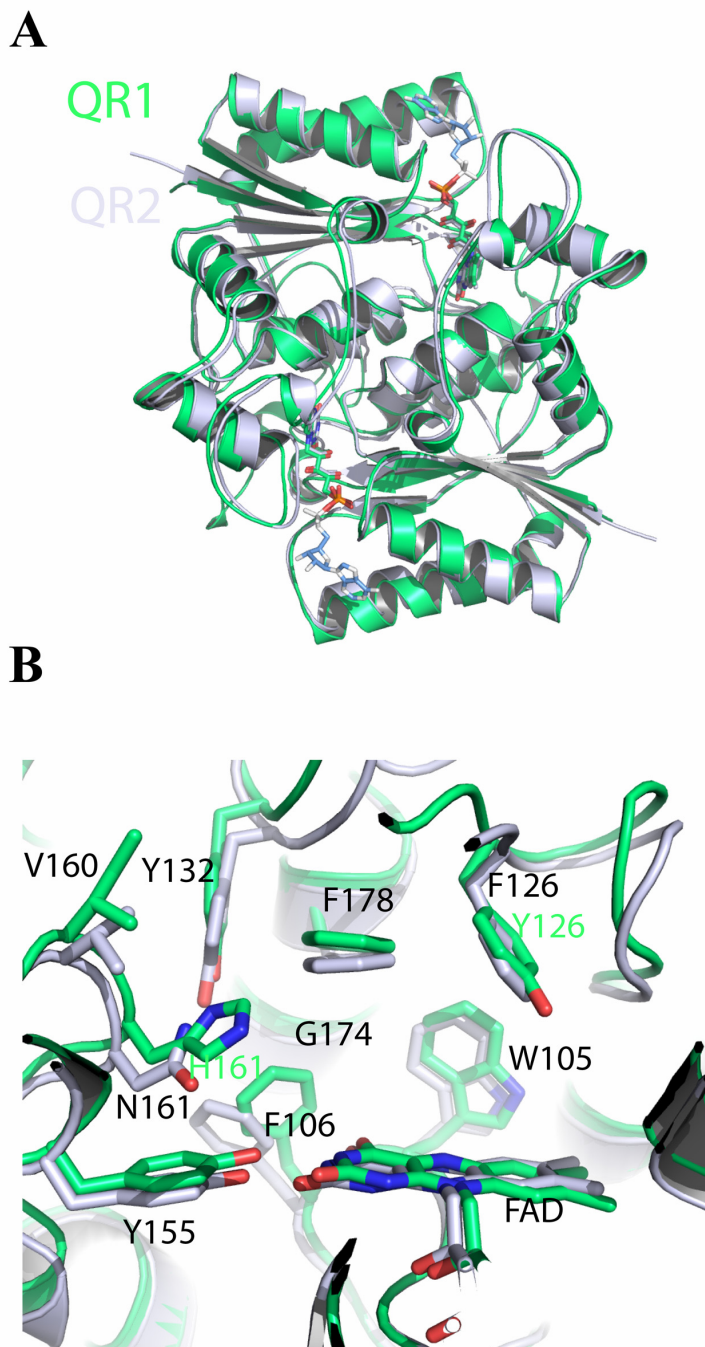

**Supplemental Figure 1. Overall structural comparisons between QR1 and QR2.** The three-dimensional structures of QR1 (green) and QR2 (gray) are aligned and further optimized for the overlap of co-factor FAD molecules. (A) The overall three-dimensional structures are nearly overlapping except for a few loop regions. (B) The conservation between QR1 and QR2 further extends to the active site residues.

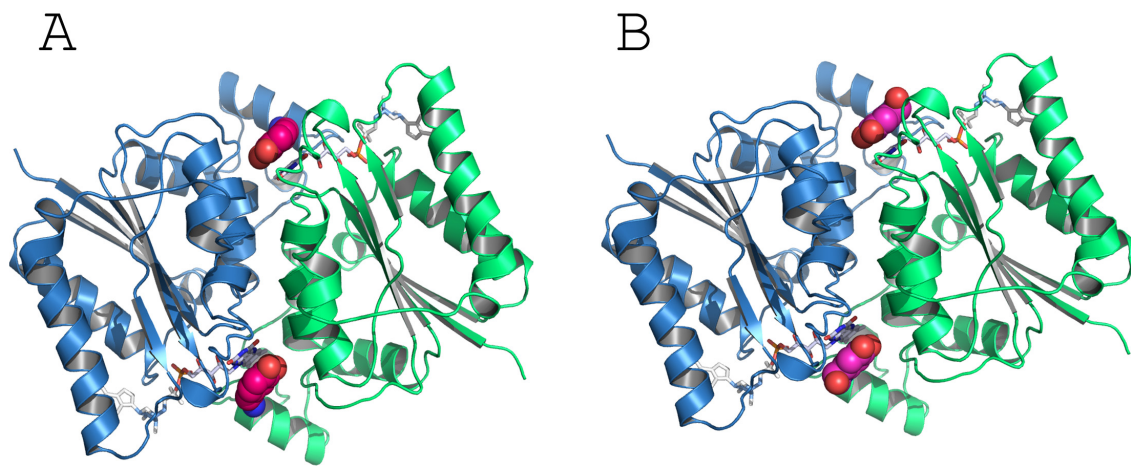

**Supplemental Figure 2.** (A) Overall structure of the QR2-dopamine complex. Dopamine (space filling model) binds to the active sites of QR2 at the dimer interface. (B) Overall structure of the QR2-adrenochrome complex. Adrenochrome is shown in a space-filling model, and the co-factor FAD is shown in stick model.

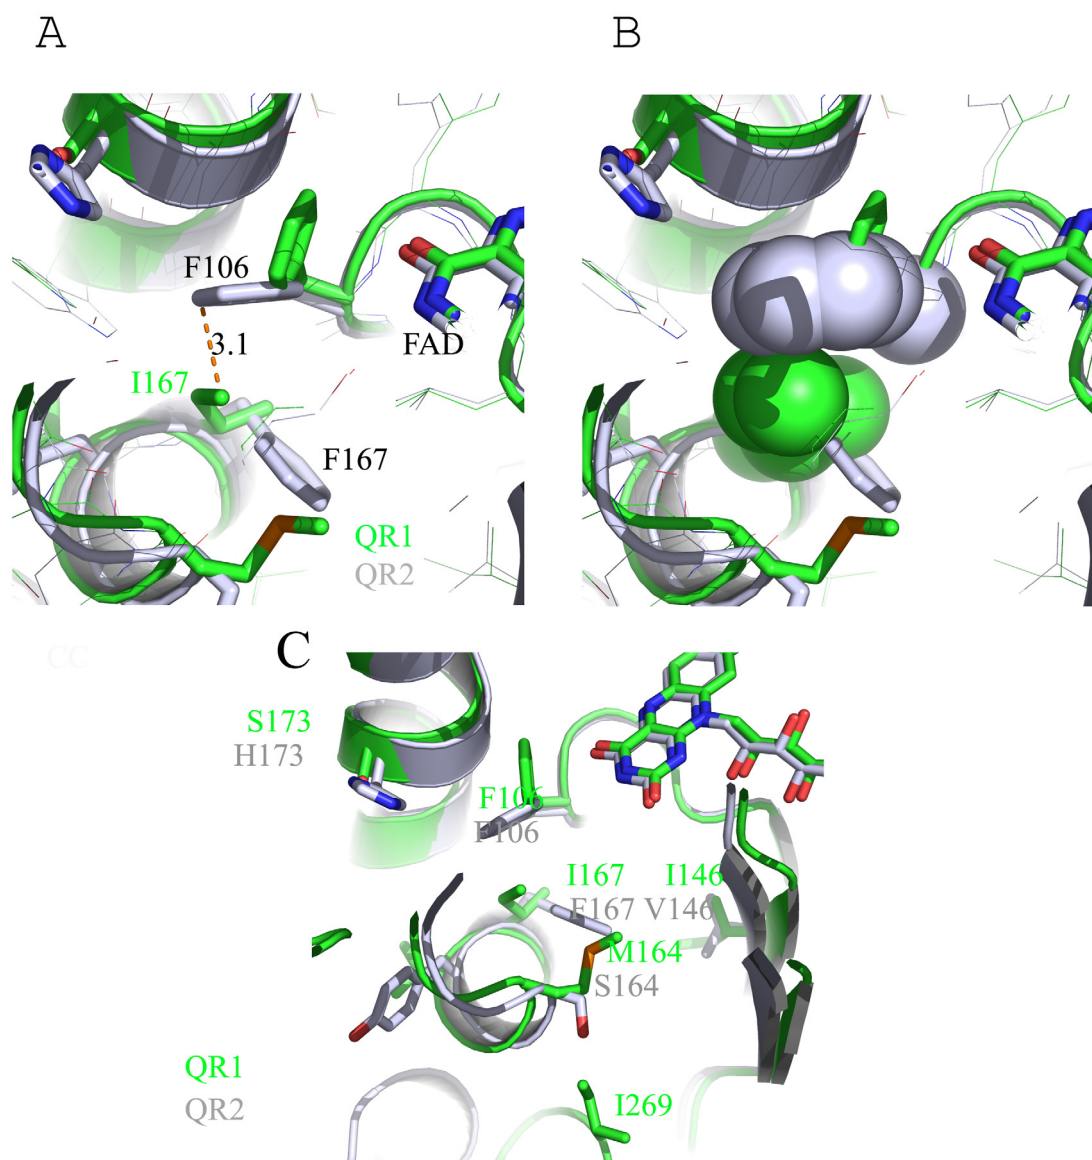

**Supplemental Figure 3. Residue differences between QR1 and QR2 near F106.** (A) The side-chains of F106 adopt different rotations as a result of surrounding residue differences between these two proteins, especially residue 167. In QR2, amino acid 167 is a phenylalanine, whereas in QR1 it is an isoleucine. The steric hindrance of the bulky I167 side-chain forces F106 to adopt a different rotamer in QR1. The distance labeled is in Å. (B) The steric hindrance can be further illustrated between I167 and F106 sidechains in a ball and stick model if F106 adopts similar rotation in QR1 as that of QR2. (C) Residue 167 is not the sole contributor for sidechain rotational differences of F106 between QR1 and QR2. Amino acid differences at residue 167, 164, and 146 all contribute to the rotational differences of the side-chains of F106 between QR1 and QR2.

**Supplemental Table 1**  
**Data collection and refinement statistics (molecular replacement)**

|                                                                  | QR2-dopamine                                  | QR2-Adrenochrome                              |
|------------------------------------------------------------------|-----------------------------------------------|-----------------------------------------------|
| <b>Data collection</b>                                           |                                               |                                               |
| Wavelength (Å)                                                   | 0.9789                                        |                                               |
| Space group                                                      | P2 <sub>1</sub> 2 <sub>1</sub> 2 <sub>1</sub> | P2 <sub>1</sub> 2 <sub>1</sub> 2 <sub>1</sub> |
| Cell dimensions                                                  |                                               |                                               |
| <i>a</i> , <i>b</i> , <i>c</i> (Å)                               | 83.44, 106.95, 56.53                          | 83.83, 106.46, 56.61                          |
| $\alpha$ , $\beta$ , $\gamma$ (°)                                | 90, 90, 90                                    | 90, 90, 90                                    |
| *Resolution (Å)                                                  | 2.1 (2.18-2.10)                               | 2.5 (2.59-2.50)                               |
| <i>R</i> <sub>sym</sub> or <i>R</i> <sub>merge</sub>             | 12.8% (41.3%)                                 | 15.5% (45.3%)                                 |
| <i>I</i> / $\sigma$ <i>I</i>                                     | 15 (3)                                        | 11 (3)                                        |
| Completeness (%)                                                 | 99.7 (99.7)                                   | 99 (99)                                       |
| Redundancy                                                       | 6.7 (6.1)                                     | 6.4 (5.9)                                     |
| <b>Refinement</b>                                                |                                               |                                               |
| Resolution (Å)                                                   | 50-2.1                                        | 50-2.5                                        |
| No. reflections                                                  | 30172                                         | 18100                                         |
| <i>R</i> <sub>work</sub> / <i>R</i> <sub>free</sub> <sup>#</sup> | 19.4%/23.7%                                   | 19.8%/25.9%                                   |
| No. atoms                                                        |                                               |                                               |
| Protein                                                          | 3648                                          | 3648                                          |
| Ligand/ion                                                       | 22 (dopamine)                                 | 26 (adrenochrome)                             |
| Water                                                            | 346                                           | 293                                           |
| <i>B</i> -factors                                                |                                               |                                               |
| Protein                                                          | 22.5                                          | 24.54                                         |
| Ligand/ion                                                       | 36.9                                          | 44.5                                          |
| Water                                                            | 31.1                                          | 29.3                                          |
| R.m.s. deviations                                                |                                               |                                               |
| Bond lengths (Å)                                                 | 0.007                                         | 0.008                                         |
| Bond angles (°)                                                  | 1.2                                           | 1.2                                           |

\*Values in parentheses are for highest-resolution shell.

<sup>#</sup>*R*<sub>free</sub> is the *R*-factor for a selected subset (10%) of the reflections that were not included in prior refinement calculations.
